# Supplementary material
Source: HighWire-hosted journal article supplement (http://www.cmaj.ca/highwire/filestream/59078/field_highwire_adjunct_files/0/decision-shafran-1-at.pdf)
Supplement: decision-shafran-1-at.pdf [file decision-shafran-1-at.pdf]

| <b>Appendix 1: Recommended checklist for infection screening and prevention prior to prescribing glucocorticoid therapy</b> |                                                                                                                                                                                                   |                                                                                                     |                                                                                                 |
|-----------------------------------------------------------------------------------------------------------------------------|---------------------------------------------------------------------------------------------------------------------------------------------------------------------------------------------------|-----------------------------------------------------------------------------------------------------|-------------------------------------------------------------------------------------------------|
| Infection                                                                                                                   | Indication for Screening                                                                                                                                                                          | Screening Test(s)                                                                                   | First-line Treatment or Action                                                                  |
| Latent tuberculosis (LTBI) infection                                                                                        | Prednisone equivalent $\geq 15$ mg/day; for $> 1$ month<br>AND<br>$\geq 1$ other risk factor for LTBI*                                                                                            | Tuberculin skin test (TST)<br>OR<br>Interferon gamma release assay (IGRA) <sup>†</sup>              | Isoniazid 5 mg/kg/day (up to 300 mg/day) with pyridoxine 25–50 mg/day for 9 months <sup>1</sup> |
| Hepatitis B virus (HBV)                                                                                                     | Prednisone equivalent $\geq 7.5$ mg/d; <sup>2</sup> no minimum duration<br>OR<br>Prednisone equivalent $< 7.5$ mg/d in combination with another immunosuppressive medication; no minimum duration | Serologic testing for HBsAg <sup>2</sup><br>Serologic testing for HBsAg $\pm$ anti-HBc <sup>‡</sup> | Negative/negative: consider HBV vaccination <sup>2</sup>                                        |
|                                                                                                                             |                                                                                                                                                                                                   |                                                                                                     | HBsAg (+): Refer to specialist for assessment and treatment <sup>2</sup>                        |
|                                                                                                                             |                                                                                                                                                                                                   |                                                                                                     | Isolated anti-HBc (+): Refer to specialist for assessment and possible treatment <sup>2</sup>   |
| <i>Strongyloides stercoralis</i>                                                                                            | Any immunosuppression AND lived in or traveled to endemic region at any time <sup>3</sup>                                                                                                         | Serology AND/OR<br>Stool examination on three occasions for larvae <sup>3</sup>                     | Ivermectin 200 $\mu$ g/kg orally for two days                                                   |
|                                                                                                                             | Indication for Prophylaxis                                                                                                                                                                        | Prophylaxis                                                                                         |                                                                                                 |
| <i>Pneumocystis jirovecii</i> pneumonia                                                                                     | Prednisone equivalent $\geq 20$ mg/d for $\geq 4$ –8 weeks <sup>4</sup>                                                                                                                           | TMP-SMX 1 SS tablet§ or DS¶ tablet daily or 1 DS¶ tablet 3 times per week                           |                                                                                                 |

Note: HBsAg = hepatitis B surface antigen, anti-HBc = hepatitis B core antibody.  
 \*Risk factors for LTBI include: Close contacts of a person with active TB within the last 2 years; persons who have immigrated from countries with a high prevalence of TB;<sup>5</sup> persons who work or reside in institutions with a high prevalence of TB such as homeless shelters, correctional facilities, and hospitals; and groups with high rates of TB transmission, such as homeless persons and injection drug users.<sup>6</sup>  
 †Although the IGRA is more specific than the TST and requires only single-visit testing, it is also more expensive. It may be performed when risks of infection, progression to active TB, or poor outcome are high, or if an initial TST is indeterminate.<sup>2</sup>  
 ‡Although anti-HBc is recommended only for high-risk patients,<sup>7</sup> there are no reported cases of HBV reactivation in HBsAg-negative/anti-HBc-positive patients receiving glucocorticoids alone. It is therefore reasonable to order anti-HBc for patients to receive glucocorticoid therapy in combination with at least one other immunosuppressive medication.  
 §SS = Single-strength.  
 ¶DS = Double-strength.

## References

1. Canadian Thoracic Society. Canadian tuberculosis standards, 7th edition 2013. *Can Resp J* 2013;20(SupplA):1-174.
2. Coffin CS, Fung SK, Ma MM. Management of chronic hepatitis B: Canadian Association for the Study of the Liver consensus guidelines. *Can J Gastroenterol* 2012;26:917-38.
3. Ramanathan R, Nutman T. *Strongyloides stercoralis* infection in the immunocompromised host. *Curr Infect Dis Rep* 2008;10:105-10.
4. Green H, Paul M, Vidal L, et al. Prophylaxis of pneumocystis pneumonia in immunocompromised non-HIV-infected patients: systematic review and meta-analysis of randomized controlled trials. *Mayo Clin Proc* 2007;82:1052-9.
5. Estimated tuberculosis (TB) incidence rates, 2012 (map). In: *Global tuberculosis report 2013*. Geneva (Switzerland): World Health Organization; 2013. Available: [www.who.int/tb/publications/global\\_report/en/](http://www.who.int/tb/publications/global_report/en/) (accessed 2014 May 5).
6. Basic TB facts. Atlanta (GA): US Centers for Disease Control and Prevention; 2012. Available: [www.cdc.gov/tb/topic/basics/risk.htm](http://www.cdc.gov/tb/topic/basics/risk.htm) (accessed 2013 Dec. 7).
7. Lok ASF, McMahon BJ. AASLD practice guidelines. Chronic hepatitis B: update 2009. *Hepatology* 2009;50:1-36.
